# Supplementary material
Source: PubMed Central journal article supplement (PMC3871994)
Supplement: NIHMS529426-supplement-Supp_info___last_page_of_article_.pdf [file NIHMS529426-supplement-Supp_info___last_page_of_article_.pdf]

- Borrelia californiensis* sp. nov., and genomospecies 1 and 2. *Int. J. Med. Microbiol.* 297:263–271.
- Purvis, A., S. Nee, and P. H. Harvey. 1995. Macroevolutionary inferences from primate phylogeny. *Proc. R. Soc. Lond. B* 260:329–333.
- Pybus, O. G., and P. H. Harvey. 2000. Testing macro-evolutionary models using incomplete molecular phylogenies. *Proc. R. Soc. Lond. B* 267:2267–2272.
- Qiu, W. G., S. E. Schutzer, J. F. Bruno, O. Attie, Y. Xu, J. J. Dunn, C. M. Fraser, S. R. Casjens, and B. J. Luft. 2004. Genetic exchange and plasmid transfers in *Borrelia burgdorferi sensu stricto* revealed by three-way genome comparisons and multilocus sequence typing. *Proc. Natl. Acad. Sci. USA* 101:14150–14155.
- Rabosky, D. L. 2006. Likelihood methods for detecting temporal shifts in diversification rates. *Evolution* 60:1152–1164.
- . 2009. Ecological limits and diversification rate: alternative paradigms to explain the variation in species richness among clades and regions. *Ecol. Lett.* 12:735–743.
- Rabosky, D. L., and R. E. Glor. 2010. Equilibrium speciation dynamics in a model adaptive radiation of island lizards. *Proc. Natl. Acad. Sci. USA* 107:22178–22183.
- Rabosky, D. L., and I. J. Lovette. 2008. Explosive evolutionary radiations: decreasing speciation or increasing extinction through time? *Evolution* 62:1866–1875.
- Rambaut, A., and A. J. Drummond. 2007. Tracer v1.4. Available at: [beast.bio.ac.uk/Tracer](http://beast.bio.ac.uk/Tracer). Accessed September 2009.
- Revell, L. J., L. J. Harmon, and R. E. Glor. 2005. Underparameterized model of sequence evolution leads to bias in the estimation of diversification rates from molecular phylogenies. *Syst. Biol.* 54:973–983.
- Richter, D., D. Postic, N. Sertour, I. Livey, F.-R. Matuschka, and G. Baranton. 2006. Delineation of *Borrelia burgdorferi sensu lato* species by multilocus sequence analysis and confirmation of the delineation of *Borrelia spielmanii* sp. nov. *Int. J. Syst. Evol. Microbiol.* 56:873–881.
- Rokas, A., D. Krüger, and S. B. Carroll. 2005. Animal evolution and the molecular signature of radiations compressed in time. *Science* 310:1933–1938.
- Rudenko, N., M. Golovchenko, L. Grubhoffer, and J. H. Oliver, Jr. 2009. *Borrelia carolinensis* sp. nov., a new (14th) member of the *Borrelia burgdorferi sensu lato* complex from the southeastern region of the United States. *J. Clin. Microbiol.* 47:134–141.
- . 2011. *Borrelia carolinensis* sp. nov., a new species of *Borrelia burgdorferi sensu lato* isolated from rodents and tick from the southeastern United States. *Int. J. Syst. Evol. Microbiol.* 61:381–383.
- Rundell, R. J., and T. D. Price. 2009. Adaptive radiation, nonadaptive radiation, ecological speciation and nonecological speciation. *Trends Ecol. Evol.* 24:394–399.
- Sanderson, M. J. 2003. r8s: inferring absolute rates of molecular evolution and divergence times in the absence of a molecular clock. *Bioinformatics* 19:301–302.
- Sanderson, M. J., and M. J. Donoghue. 1994. Shifts in diversification rate with the origin of angiosperms. *Science* 264:1590–1593.
- Schluter, D. 2000. *The ecology of adaptive radiation*. Oxford Univ. Press, New York.
- Schuettpelz, E., and K. M. Pryer. 2009. Evidence for a Cenozoic radiation of ferns in an angiosperm-dominated canopy. *Proc. Natl. Acad. Sci. USA* 106:11200–11205.
- Simpson, G. G. 1953. *The major features of evolution*. Columbia Univ. Press, New York.
- Stadler, T. 2011. Mammalian phylogeny reveals recent diversification rate shifts. *Proc. Natl. Acad. Sci. USA* 108:6187–6192.
- Swofford, D. L. 2003. PAUP\*. Phylogenetic analysis using parsimony (\*and other methods). Sinauer Associates, Sunderland, MA.
- Valente, L. M., V. Savolainen, and P. Vargas. 2010. Unparalleled rates of species diversification in Europe. *Proc. R. Soc. Lond. B* 277:1489–1496.
- van Dam, A. P. 2002. Diversity of Ixodes-borne *Borrelia* species—clinical, pathogenetic, and diagnostic implications and impact on vaccine development. *Vector Borne Zoonotic Dis.* 2:249–254.
- Xu, G., Q. Q. Fang, J. E. Keirans, and L. A. Durden. 2003. Molecular phylogenetic analyses indicate that the *Ixodes ricinus* complex is a paraphyletic group. *J. Parasitol.* 89:452–457.
- Yoder, J. B., E. Clancey, S. Des Roches, J. M. Eastman, L. Gentry, W. Godsoe, T. J. Hagey, D. Jochimsen, B. P. Oswald, J. Robertson, et al. 2010. Ecological opportunity and the origin of adaptive radiations. *J. Evol. Biol.* 23:1581–1596.
- Zink, R. M., and J. B. Slowinski. 1995. Evidence from molecular systematics for decreased avian diversification in the pleistocene Epoch. *Proc. Natl. Acad. Sci. USA* 92:5832–5835.

Associate Editor: P. Turner

## Supporting Information

The following supporting information is available for this article:

**Figure S1.** Phylogenetic trees inferred by maximum likelihood with a forced molecular clock for: (A) the three-locus tree (multilocus3), (B) the seven-locus tree (multilocus7), and (C) the chromosome tree (chromosome).

**Figure S2.** Phylogenetic tree inferred by Bayesian Estimation of Species Trees (BEST).

**Figure S3.** For most of the seven individual locus phylogenies trees, likelihood ratio tests indicate that the pure-birth model with decaying diversification rate is significantly more likely than a pure-birth model with constant rate regardless of the assumed number of species in the *B. burgdorferi* sl clade.

Supporting Information may be found in the online version of this article.

Please note: Wiley-Blackwell is not responsible for the content or functionality of any supporting information supplied by the authors. Any queries (other than missing material) should be directed to the corresponding author for the article.
